# Supplementary material
Source: HighWire-hosted journal article supplement (https://www.annfammed.org/highwire/filestream/15779/field_highwire_adjunct_files/0/Klocke.pdf)
Supplement: Klocke.pdf [file Klocke.pdf]

### Supplemental materials for:

Klocke C, Valentini J, Stolz R, Gaßner L, Joos S, Förster C. Patients' experiences with therapeutic approaches for post-covid syndrome: results of a crowdsourced research survey. *Ann Fam Med.* 2023;21(1):73-75.

**Supplemental Table 1: Online questionnaire (used in German, translated into English for publication)**

| No. | Question                                                                                                                                                                                                                                                                                                                                                                                                                                                                                                                                                                                                                                                                                                                                                                                           | Response option                                                                                                                                                                                                                                                                                                              |
|-----|----------------------------------------------------------------------------------------------------------------------------------------------------------------------------------------------------------------------------------------------------------------------------------------------------------------------------------------------------------------------------------------------------------------------------------------------------------------------------------------------------------------------------------------------------------------------------------------------------------------------------------------------------------------------------------------------------------------------------------------------------------------------------------------------------|------------------------------------------------------------------------------------------------------------------------------------------------------------------------------------------------------------------------------------------------------------------------------------------------------------------------------|
|     | <p>Dear Participant,</p> <p>We are pleased about your interest in our survey on the topic of "Post-COVID"! By completing our short questionnaire, you will help us to gather experience on post/long-COVID. With your help, we would like to derive therapeutic approaches for clinical studies and make them available to the general public. In this way, you contribute to improving the care of those affected. For this purpose, we request anonymized data on your symptoms, applied therapies, age, gender and profession. We cannot trace this information back to you personally.</p> <p>Thank you very much for your support</p> <p>Your Post-COVID Study Team</p> <p>(<i>contact details, privacy notice, privacy consent</i>)</p>                                                      |                                                                                                                                                                                                                                                                                                                              |
| 1   | When was the first time you tested positive for Covid-19?                                                                                                                                                                                                                                                                                                                                                                                                                                                                                                                                                                                                                                                                                                                                          | <p>[single choice]</p> <p>... within the last 4 weeks<br/>... within the last 3 months<br/>... within the last 6 months<br/>... more than 6 months ago<br/>... I did <b>not</b> test positive for Covid-19</p>                                                                                                               |
| 2   | What are the main symptoms you are affected from after your infection with Covid-19?                                                                                                                                                                                                                                                                                                                                                                                                                                                                                                                                                                                                                                                                                                               | <p>[multiple choice]</p> <p>... physical exhaustion/so called "fatigue"<br/>... shortness of breath<br/>... difficulty concentrating<br/>... psychological impairment (sadness, anxiety, irritability, sleep disturbances, others)<br/>... loss of taste and smell<br/>... headaches<br/>... others, namely: (free text)</p> |
|     | <p>In the following, we are interested in which therapies you have pursued with regard to your post-Covid complaints. In addition, we would like to know what experiences you have had with them. The questions on this page refer to only one therapy at a time. If you have used more than one therapy, please indicate only one therapy below. If you answer the last question on this page with "yes", a new page will open where you can enter further therapy approaches. You can enter up to 5 therapies. You can name everything here that you have tried because of your complaints, e.g. certain medications, home remedies, nutritional supplements/vitamins, naturopathic procedures, acupuncture, sports, relaxation exercises, visits to certain therapists, physiotherapy, etc.</p> |                                                                                                                                                                                                                                                                                                                              |
| 3   | Therapy approach (no. 1): Please describe the therapy.                                                                                                                                                                                                                                                                                                                                                                                                                                                                                                                                                                                                                                                                                                                                             | (free text)                                                                                                                                                                                                                                                                                                                  |
| 4   | What complaint(s) or symptom(s) did you use this therapy for?                                                                                                                                                                                                                                                                                                                                                                                                                                                                                                                                                                                                                                                                                                                                      | (free text)                                                                                                                                                                                                                                                                                                                  |
| 5   | How well did the therapeutic approach you mentioned help with the complaint(s) you described?                                                                                                                                                                                                                                                                                                                                                                                                                                                                                                                                                                                                                                                                                                      | <p>[single choice]</p> <p>very good<br/>good<br/>medium<br/>little<br/>not at all</p>                                                                                                                                                                                                                                        |
| 6   | Did you try other therapeutic approaches?                                                                                                                                                                                                                                                                                                                                                                                                                                                                                                                                                                                                                                                                                                                                                          | [single choice]                                                                                                                                                                                                                                                                                                              |

|   |                                                                                                                                                                                                                                                  |                                                                                                                                                                                                                                                                                                                                                                                                                                                                                |
|---|--------------------------------------------------------------------------------------------------------------------------------------------------------------------------------------------------------------------------------------------------|--------------------------------------------------------------------------------------------------------------------------------------------------------------------------------------------------------------------------------------------------------------------------------------------------------------------------------------------------------------------------------------------------------------------------------------------------------------------------------|
|   |                                                                                                                                                                                                                                                  | <p>yes [loop to question no. 3]</p> <p>no [ go on]</p>                                                                                                                                                                                                                                                                                                                                                                                                                         |
| 7 | <p>What offers, help or support would you wish for?</p>                                                                                                                                                                                          | <p>[single choice]</p> <p>I wish for the following: (free text)</p> <p>I don't miss anything.</p>                                                                                                                                                                                                                                                                                                                                                                              |
| 8 | <p>What is the total amount of time you are or have been on sick leave for your COVID-infection?</p> <p>If you had to take repeated sick leave, please indicate the total duration.</p>                                                          | <p>(please insert number) weeks</p>                                                                                                                                                                                                                                                                                                                                                                                                                                            |
| 9 | <p>Because of your post-COVID complaints, have you been (or are you)...</p> <p>(Please indicate examinations or measures that took place at the earliest 4 weeks after your infection, i.e. after the acute phase of your COVID-19 disease.)</p> | <p>[multiple choice]</p> <p>... seeing a specialist (e.g. lung specialist, cardiologist, others)?</p> <p>...treated in a hospital as an inpatient?</p> <p>...to an X-ray examination or CT scan?</p> <p>...to a blood test (e.g. at the family doctor or specialist)?</p> <p>...in psychotherapy?</p> <p>...in a rehabilitation/cure?</p> <p>...in physiotherapy?</p> <p>...in contact with advocacy groups?</p> <p>...none of these measures were carried out in my case.</p> |
|   | <p>What is your age?</p>                                                                                                                                                                                                                         | <p>(please insert number) years</p>                                                                                                                                                                                                                                                                                                                                                                                                                                            |
|   | <p>You are...</p>                                                                                                                                                                                                                                | <p>[single choice]</p> <p>... male</p> <p>... female</p> <p>... diverse</p>                                                                                                                                                                                                                                                                                                                                                                                                    |
|   | <p>Do you work in a healthcare profession?</p>                                                                                                                                                                                                   | <p>[single choice]</p> <p>...yes</p> <p>... no</p>                                                                                                                                                                                                                                                                                                                                                                                                                             |
|   | <p>In which country do you live (predominantly)?</p> <p>Please mark the answer that corresponds.</p>                                                                                                                                             | <p>[single choice]</p> <p>...Germany</p> <p>... Austria</p> <p>... Switzerland</p> <p>...other, namely: (free text)</p>                                                                                                                                                                                                                                                                                                                                                        |

**Supplemental Table 2: Description of categories (codebook)**

|    | <b>Category</b>                                                              | <b>Description</b>                                                                                                                                                                      |
|----|------------------------------------------------------------------------------|-----------------------------------------------------------------------------------------------------------------------------------------------------------------------------------------|
| 1  | Nutritional supplements                                                      | Vitamins, micronutrients, probiotics, etc. [not : herbal remedies, dietary change]                                                                                                      |
| 2  | Sports/exercise                                                              | Every kind of sports/ exercise/ physical activity, from taking a walk to high-level training                                                                                            |
| 3  | Mind-Body-Medicine                                                           | Mindfulness-based stress reduction, mindfulness, mindfulness-based movements [yoga, Tai Ji, Qi Gong, Eurythmy), meditation                                                              |
| 4  | Rest                                                                         | Pacing, resting, napping, increased levels of sleep, etc.                                                                                                                               |
| 5  | Cortisone/corticosteroids of all kinds                                       | Cortisone/corticosteroids of all kinds (inhaled, oral, topical)                                                                                                                         |
| 6  | Other medication                                                             | Every kind of medication (e.g., beta receptor blockers, cold remedies) [not: cortisone/corticosteroids, pain medication, herbal medication, inhalants, vaccination, psychotropic drugs] |
| 7  | Physiotherapy                                                                | Physiotherapy with therapist [not: sports and activity without guidance]                                                                                                                |
| 8  | Pain medication of all kinds                                                 | E.g. nonsteroidal antiinflammatory drugs, paracetamol, opioids, etc.                                                                                                                    |
| 9  | Phytotherapy/herbal medication                                               | Herbal remedies (e.g. tea, curcuma, etc.) and phytotherapeutics (e.g. myrtol), cannabinoids, etc.                                                                                       |
| 10 | Respiratory therapy                                                          | Professionally guided [not: yoga, olfactory training, taking a deep breath during walking]                                                                                              |
| 11 | Rehabilitation                                                               | Rehabilitation (inpatient or outpatient)                                                                                                                                                |
| 12 | Medical consultation                                                         | Medical consultation through general practitioners, other specialist, special outclinic                                                                                                 |
| 13 | Manual medicine                                                              | Manual medicine, osteopathy, chiropractic, tuina, craniosacral therapy [not: massage]                                                                                                   |
| 14 | Psychotherapy                                                                | Psychotherapy or psychotherapeutic consultation                                                                                                                                         |
| 15 | Inhalants (non-cortisone)                                                    | Non-cortisone inhalants, e.g. asthma inhaler, saline inhalation, salbutamol sulfate inhalation                                                                                          |
| 16 | Other (e.g., mouthwash, singing)                                             | Everything not grouped in any other category, e.g. mouthwash, singing, playing an instrument                                                                                            |
| 17 | Dietary change                                                               | All kinds of change in recent diet, e.g. eating more/less, vegetarian diet, etc.                                                                                                        |
| 18 | Other physical therapy (e.g., thermotherapy, contrast bath therapy)          | External applications, e.g. therapeutic baths, compresses, thermotherapy, etc. [not: physiotherapy]                                                                                     |
| 19 | Occupational therapy                                                         | Professional occupational therapy                                                                                                                                                       |
| 20 | Homeopathy                                                                   | Homeopathic consultations, homeopathic remedies                                                                                                                                         |
| 21 | Memory training/concentration exercises                                      | Memory training, concentration exercises, e.g. puzzling                                                                                                                                 |
| 22 | Olfactory training                                                           | Professional or non-professional use of odors (e.g. coffee, oils, etc.) [not: aromatherapy]                                                                                             |
| 23 | Complementary and integrative medicine in general (CIM)/other CIM procedures | CIM procedures not listed elsewhere, e.g., neural therapy, Ayurveda, "complementary medicine" as word                                                                                   |
| 24 | Acupuncture/acupressure                                                      | Professional therapy with/without needles on acupoints                                                                                                                                  |

|    |                                                |                                                                                           |
|----|------------------------------------------------|-------------------------------------------------------------------------------------------|
| 25 | Psychotropic drugs                             | Psychotropic drugs, e.g. benzodiazepines, antidepressants, neuroleptics, etc.             |
| 26 | Traditional Chinese Medicine – pharmacotherapy | Traditional Chinese herbal medicine                                                       |
| 27 | Massages                                       | massages [not: manual medicine]                                                           |
| 28 | Vaccination against SARS-CoV-2                 | any kind of vaccination against SARS-CoV-2                                                |
| 29 | Aromatherapy                                   | indicated use of essential oils, e.g. lavender oil for sleeping [not: olfactory training] |
| 30 | Speech therapy                                 | professional speech therapy, logopedics                                                   |
